# Supplementary material for: Next-generation sequencing-based molecular diagnosis of 35 Hispanic retinitis pigmentosa probands
Source: PubMed Central journal article supplement (PMC5011706; doi:10.1038/srep32792), 2016-09-06
Supplement: srep32792-s1.pdf [file srep32792-s1.pdf]

## **SUPPLEMENTARY INFORMATION**

### **Next-generation sequencing-based molecular diagnosis of 35 Hispanic retinitis pigmentosa probands**

Qi Zhang, Mingchu Xu, Jennifer D. Verriotto, Yumei Li, Hui Wang, Lin Gan, Byron L. Lam, Rui Chen

**Supplementary Table 1.** List of known retinal disease genes screened in this study.

|                 |                |                 |                |                 |                 |
|-----------------|----------------|-----------------|----------------|-----------------|-----------------|
| <i>ABCA4</i>    | <i>CDH3</i>    | <i>GNAT2</i>    | <i>MKKS</i>    | <i>PLA2G5</i>   | <i>SAG</i>      |
| <i>ABCC6</i>    | <i>CDHR1</i>   | <i>GNPTG</i>    | <i>MKS1</i>    | <i>PRCD</i>     | <i>SDCCAG8</i>  |
| <i>ABHD12</i>   | <i>CEP164</i>  | <i>GPR179</i>   | <i>MPV17</i>   | <i>PRD</i>      | <i>SEMA4A</i>   |
| <i>ACBD5</i>    | <i>CEP290</i>  | <i>GRK1</i>     | <i>MTTP</i>    | <i>PROM1</i>    | <i>SLC24A1</i>  |
| <i>ADAM9</i>    | <i>CERKL</i>   | <i>GRM6</i>     | <i>MYO7A</i>   | <i>PRPF3</i>    | <i>SLC6A5</i>   |
| <i>ADAMTS18</i> | <i>CFB</i>     | <i>GUCA1A</i>   | <i>NDP</i>     | <i>PRPF31</i>   | <i>SNRNP200</i> |
| <i>ADGRA3</i>   | <i>CFH</i>     | <i>GUCA1B</i>   | <i>NEK2</i>    | <i>PRPF6</i>    | <i>SPATA7</i>   |
| <i>ADGRV1</i>   | <i>CHM</i>     | <i>GUCY2D</i>   | <i>NMNAT1</i>  | <i>PRPF8</i>    | <i>TEAD1</i>    |
| <i>AHI1</i>     | <i>CIB2</i>    | <i>HARS</i>     | <i>NPHP1</i>   | <i>PRPH2</i>    | <i>TIMM8A</i>   |
| <i>AIPL1</i>    | <i>CISD2</i>   | <i>HMCN1</i>    | <i>NPHP3</i>   | <i>PVRL1</i>    | <i>TIMP3</i>    |
| <i>ALMS1</i>    | <i>CLN3</i>    | <i>HTRA1</i>    | <i>NPHP4</i>   | <i>RAB28</i>    | <i>TK2</i>      |
| <i>ARL2BP</i>   | <i>CLRN1</i>   | <i>IDH3B</i>    | <i>NR2E3</i>   | <i>RAX2</i>     | <i>TLR3</i>     |
| <i>ARL6</i>     | <i>CNGA1</i>   | <i>IFT140</i>   | <i>NRL</i>     | <i>RB1</i>      | <i>TLR4</i>     |
| <i>ARMS2</i>    | <i>CNGA3</i>   | <i>IFT172</i>   | <i>NYX</i>     | <i>RBP3</i>     | <i>TLR6</i>     |
| <i>ATXN7</i>    | <i>CNGB1</i>   | <i>IFT27</i>    | <i>OAT</i>     | <i>RBP4</i>     | <i>TMEM126A</i> |
| <i>BBIP1</i>    | <i>CNGB3</i>   | <i>IMPDH1</i>   | <i>OFD1</i>    | <i>RCD1</i>     | <i>TMEM216</i>  |
| <i>BBS1</i>     | <i>CNNM4</i>   | <i>IMPG1</i>    | <i>OPA1</i>    | <i>RD3</i>      | <i>TMEM237</i>  |
| <i>BBS10</i>    | <i>COL11A1</i> | <i>IMPG2</i>    | <i>OPA3</i>    | <i>RDH12</i>    | <i>TOPORS</i>   |
| <i>BBS12</i>    | <i>COL2A1</i>  | <i>INPP5E</i>   | <i>OPN1LW</i>  | <i>RDH5</i>     | <i>TREX1</i>    |
| <i>BBS2</i>     | <i>COL9A1</i>  | <i>INVS</i>     | <i>OPN1MW</i>  | <i>RGR</i>      | <i>TRIM32</i>   |
| <i>BBS4</i>     | <i>CRB1</i>    | <i>IQCB1</i>    | <i>OPN1MW2</i> | <i>RGS9</i>     | <i>TRPM1</i>    |
| <i>BBS5</i>     | <i>CRX</i>     | <i>ITM2B</i>    | <i>OPN1SW</i>  | <i>RGS9BP</i>   | <i>TSPAN12</i>  |
| <i>BBS7</i>     | <i>CYP4V2</i>  | <i>JAG1</i>     | <i>OTX2</i>    | <i>RHO</i>      | <i>TTC8</i>     |
| <i>BBS9</i>     | <i>DFNB31</i>  | <i>KCNJ13</i>   | <i>PANK2</i>   | <i>RIMS1</i>    | <i>TTPA</i>     |
| <i>BEST1</i>    | <i>DHDDS</i>   | <i>KCNV2</i>    | <i>PAX2</i>    | <i>RLBP1</i>    | <i>TULP1</i>    |
| <i>C1QTNF5</i>  | <i>DMD</i>     | <i>KIAA1549</i> | <i>PCDH15</i>  | <i>ROM1</i>     | <i>UNC119</i>   |
| <i>C2</i>       | <i>DTHD1</i>   | <i>KIF11</i>    | <i>PDE6A</i>   | <i>RP1</i>      | <i>USH1C</i>    |
| <i>C21ORF2</i>  | <i>EFEMP1</i>  | <i>KLHL7</i>    | <i>PDE6B</i>   | <i>RP1L1</i>    | <i>USH1G</i>    |
| <i>C2ORF71</i>  | <i>ELOVL4</i>  | <i>LCA5</i>     | <i>PDE6C</i>   | <i>RP2</i>      | <i>USH2A</i>    |
| <i>C3</i>       | <i>EMC1</i>    | <i>LRAT</i>     | <i>PDE6G</i>   | <i>RP8</i>      | <i>VCAN</i>     |
| <i>C8ORF37</i>  | <i>ERCC6</i>   | <i>LRIT3</i>    | <i>PDE6H</i>   | <i>RP9</i>      | <i>VPS13B</i>   |
| <i>CA4</i>      | <i>EYS</i>     | <i>LRP1B</i>    | <i>PDZD7</i>   | <i>RPE65</i>    | <i>WDPCP</i>    |
| <i>CABP4</i>    | <i>FAM161A</i> | <i>LRP5</i>     | <i>PEX1</i>    | <i>RPGR</i>     | <i>WDR19</i>    |
| <i>CACNA1F</i>  | <i>FBLN5</i>   | <i>LZTFL1</i>   | <i>PEX2</i>    | <i>RPGRIP1</i>  | <i>WFS1</i>     |
| <i>CACNA2D4</i> | <i>FLVCR1</i>  | <i>MAK</i>      | <i>PEX7</i>    | <i>RPGRIP1L</i> | <i>ZNF408</i>   |
| <i>CAPN5</i>    | <i>FSCN2</i>   | <i>MERTK</i>    | <i>PGK1</i>    | <i>RRM2B</i>    | <i>ZNF423</i>   |
| <i>CC2D2A</i>   | <i>FZD4</i>    | <i>MFN2</i>     | <i>PHYH</i>    | <i>RS1</i>      | <i>ZNF513</i>   |
| <i>CDH23</i>    | <i>GNAT1</i>   | <i>MFRP</i>     | <i>PITPNM3</i> |                 |                 |

**Supplementary Figure 1.** The fundus photo of the *CHM* case (BLM049, OD).

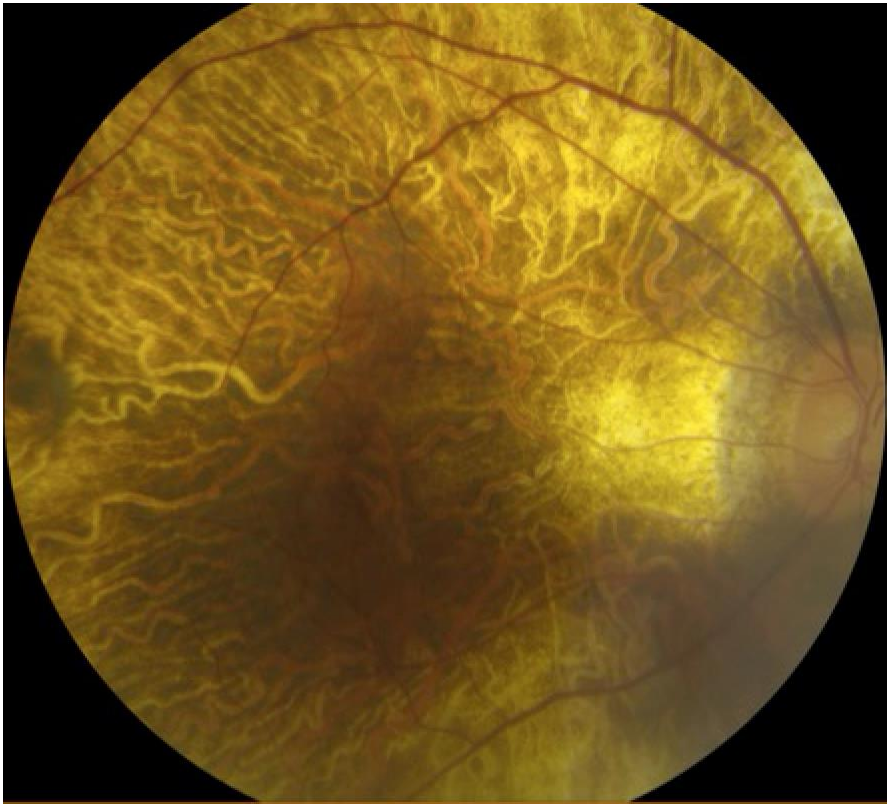

Supplementary Figure 2. The ERG data of CRD case BLM066.

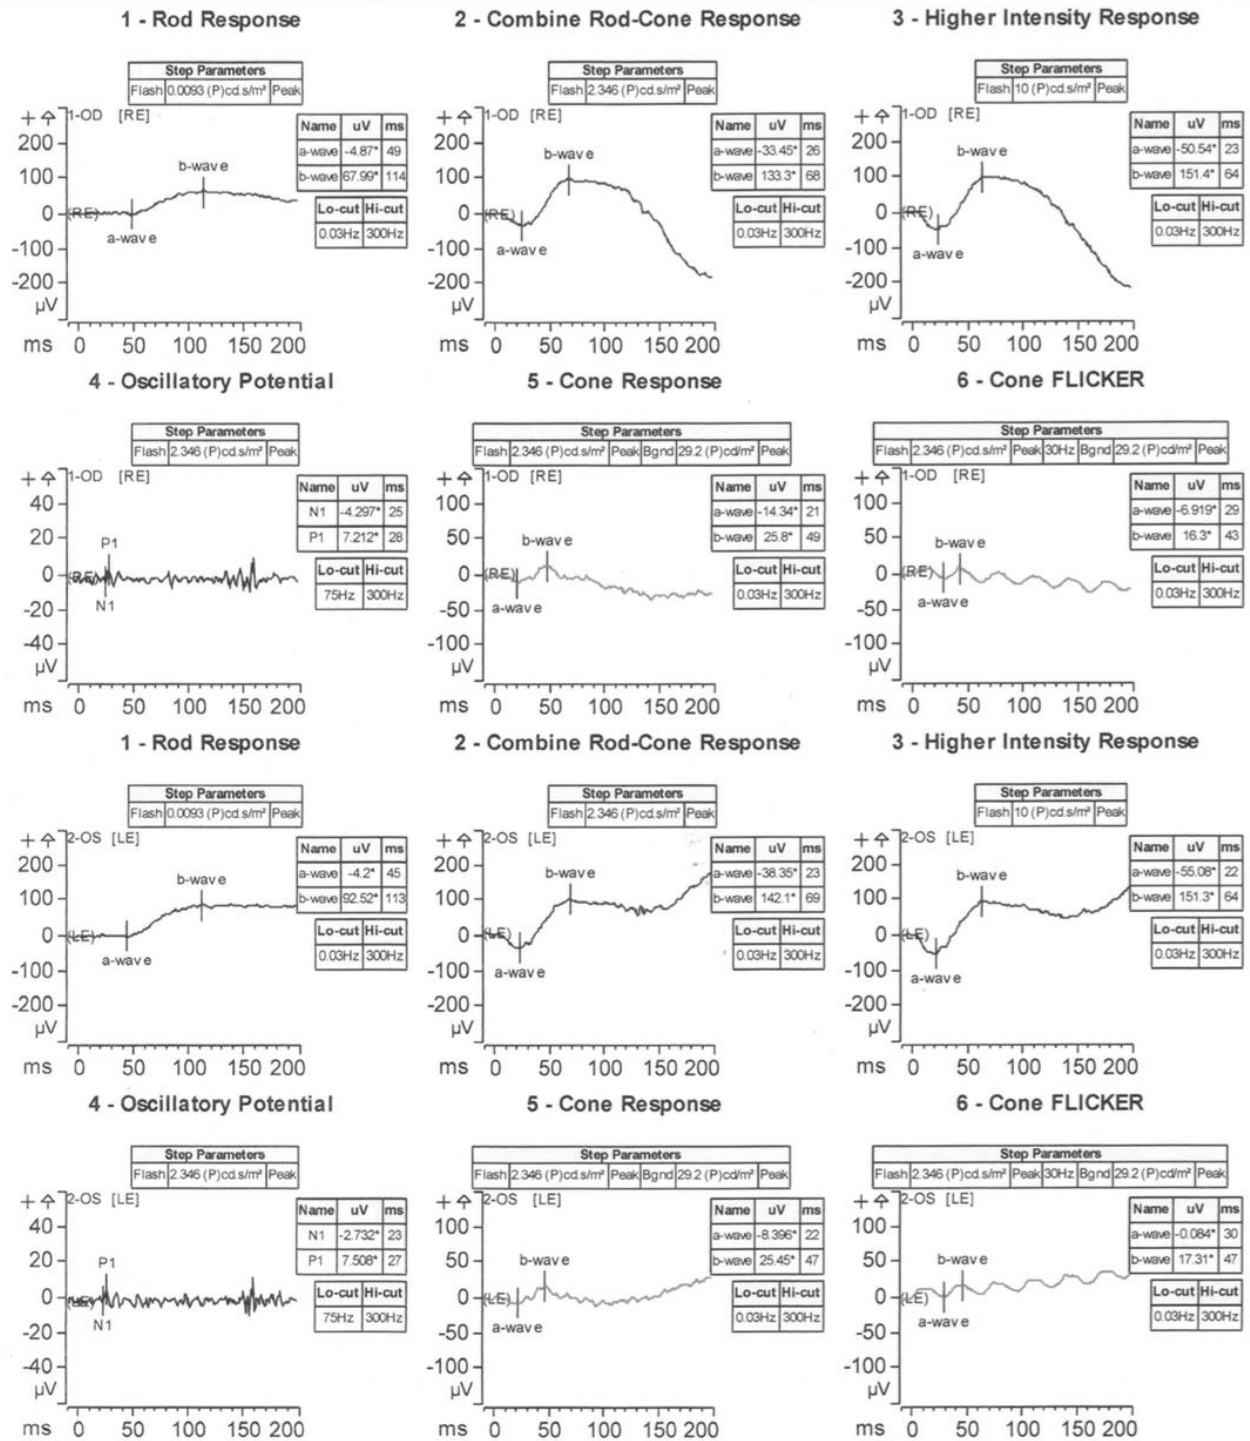

**Supplementary Figure 3.** The ERG data of CRD case BLM033.

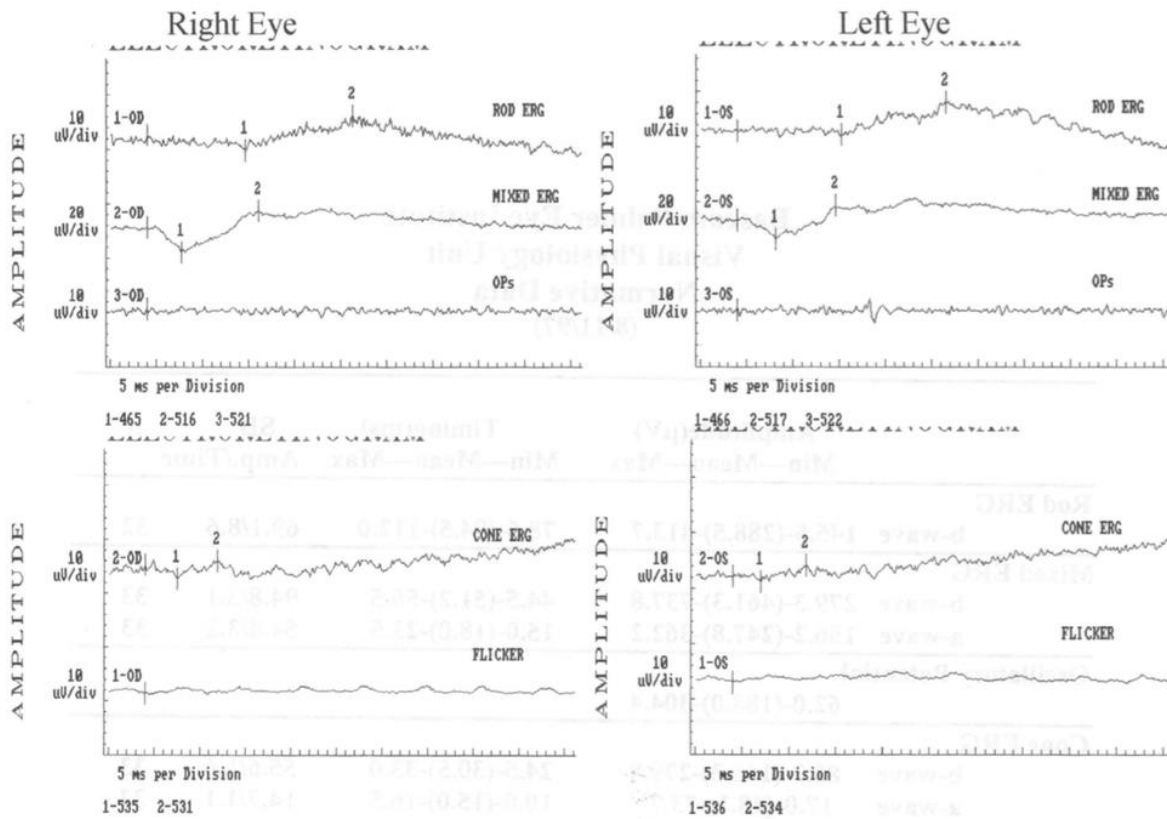

|                                |               | Amplitude (uV) |          | Timing (ms) |          |
|--------------------------------|---------------|----------------|----------|-------------|----------|
|                                |               | right eye      | left eye | right eye   | left eye |
| <b>ROD ERG:</b>                | b-wave        | 32.5           | 29.9     | 111.5       | 112.5    |
| <b>MIXED ERG:</b>              | b-wave        | 77.9           | 62.7     | 60.5        | 53.0     |
|                                | a-wave        | 45.2           | 39.1     | 18.5        | 20.5     |
| <b>OSCILLATORY POTENTIALS:</b> |               |                |          |             |          |
| <b>CONE ERG:</b>               | b-wave        | 17.6           | 15.3     | 39.5        | 39.0     |
|                                | a-wave        | 7.9            | 5.0      | 17.5        | 15.0     |
|                                | 30 Hz flicker | 5.3            | 4.9      | 41.1        | 40.7     |
